# Supplementary material for: Palladium Nanoparticles on Modified Cellulose as a Novel Catalyst for Low Temperature Gas Reactions
Source: Research Square preprint supplement (doi:10.21203/rs.3.rs-192931/v1), 2021-05-13
Supplement: Supplementary file 1 [file 8aff7af8635ea7c85d1aaa8c.docx]

**SUPLEMENTARY INFORMATION**

**PALLADIUM NANOPARTICLES ON MODIFIED CELLULOSE AS A NOVEL CATALYST FOR LOW TEMPERATURE GAS REACTIONS.**

**Esteban Gioriaa, Chiara Signorinia, María Claudia Talebb, Arne Thomasc, Magdolna R. Mihályid, Laura Gutierreza,***

*a Institute of Research on Catalysis and Petrochemistry, INCAPE, (FIQ, UNL-CONICET), Santiago del Estero, 2829, 3000, Santa Fe, Argentina*

*b Instituto de Tecnología Celulósica (ITC), Facultad de Ingeniería Química (FIQ), Universidad Nacional del Litoral (UNL), 3000 Santa Fe, Argentina.*

*c Technische Universität Berlin, Fakultät II, Institut für Chemie: Funkstionmaterialen, Sekretariat BA2, Hardenbergstraße 40, 10623 Berlin, Germany.*

*d Institute of Materials and Environmental Chemistry, Green Chemistry Research Group, Research Centre for Natural Sciences, 1117 Budapest, Hungary.*

*Corresponding Author *e-mail:* [*lbgutier@fiq.unl.edu.ar*](mailto:lbgutier@fiq.unl.edu.ar)

**S.1. Macroscopic aspect of Solucell, Solucell.Pd, CMFE and CMFE.Pd fibers**

**
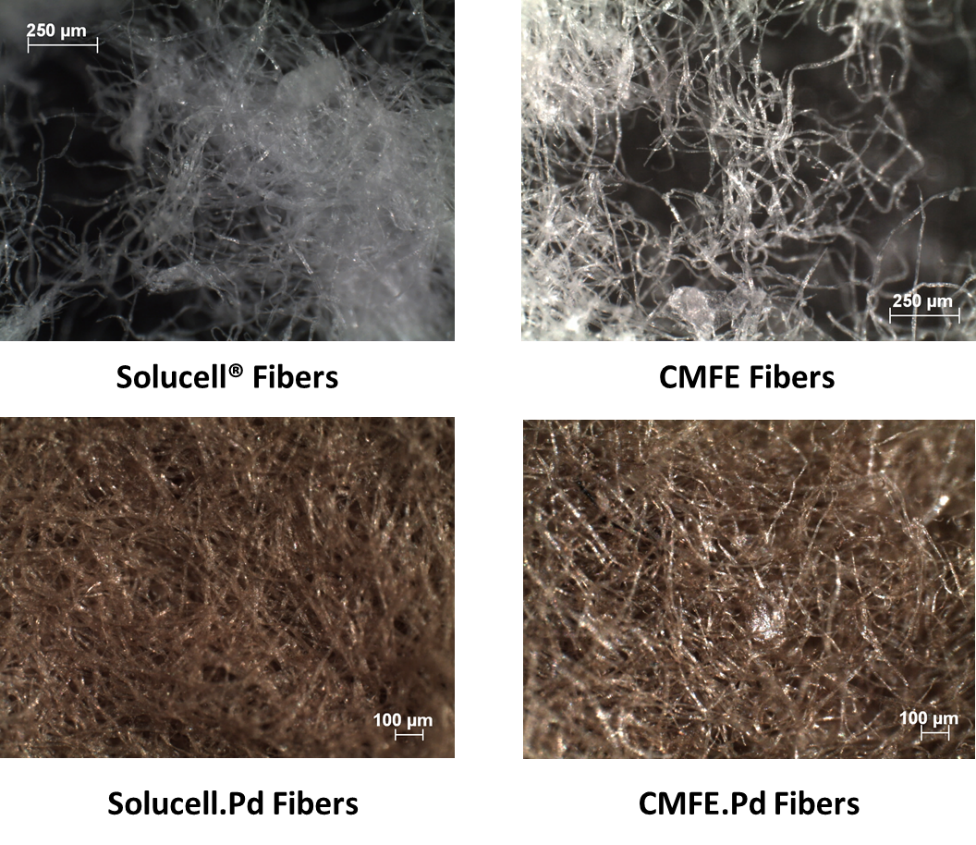
**

Figure S.1. Macroscopic aspect of Solucell, Solucell.Pd, CMFE and CMFE.Pd fibers under optical stereomicroscope.
