# Supplementary material for: Palladium Nanoparticles on Modified Cellulose as a Novel Catalyst for Low Temperature Gas Reactions
Source: Research Square preprint supplement (doi:10.21203/rs.3.rs-192931/v1), 2021-05-13
Supplement: Supplementary file 2 [file 801e202ade21218f8356249d.docx]

**Highlights**

Cellulose fibers were parcially functionalized with carboxymethyl groups

PdNPs were added to the modified cellulosic fibers for catalytic applications

The catalyst resulted active for the reduction of NO with H2

Moddified cellulose with Pd was obtained for low temperature catalytic reactions

This approach can be extended for obtaining catalysts for low temperature reactions
